# Supplementary material for: Influence of batch effect correction methods on drug induced differential gene expression profiles
Source: PubMed Central journal article supplement (PMC6706913; doi:10.1186/s12859-019-3028-6), 2019-08-22
Supplement: 12859_2019_3028_MOESM2_ESM.pdf [file 12859_2019_3028_MOESM2_ESM.pdf]

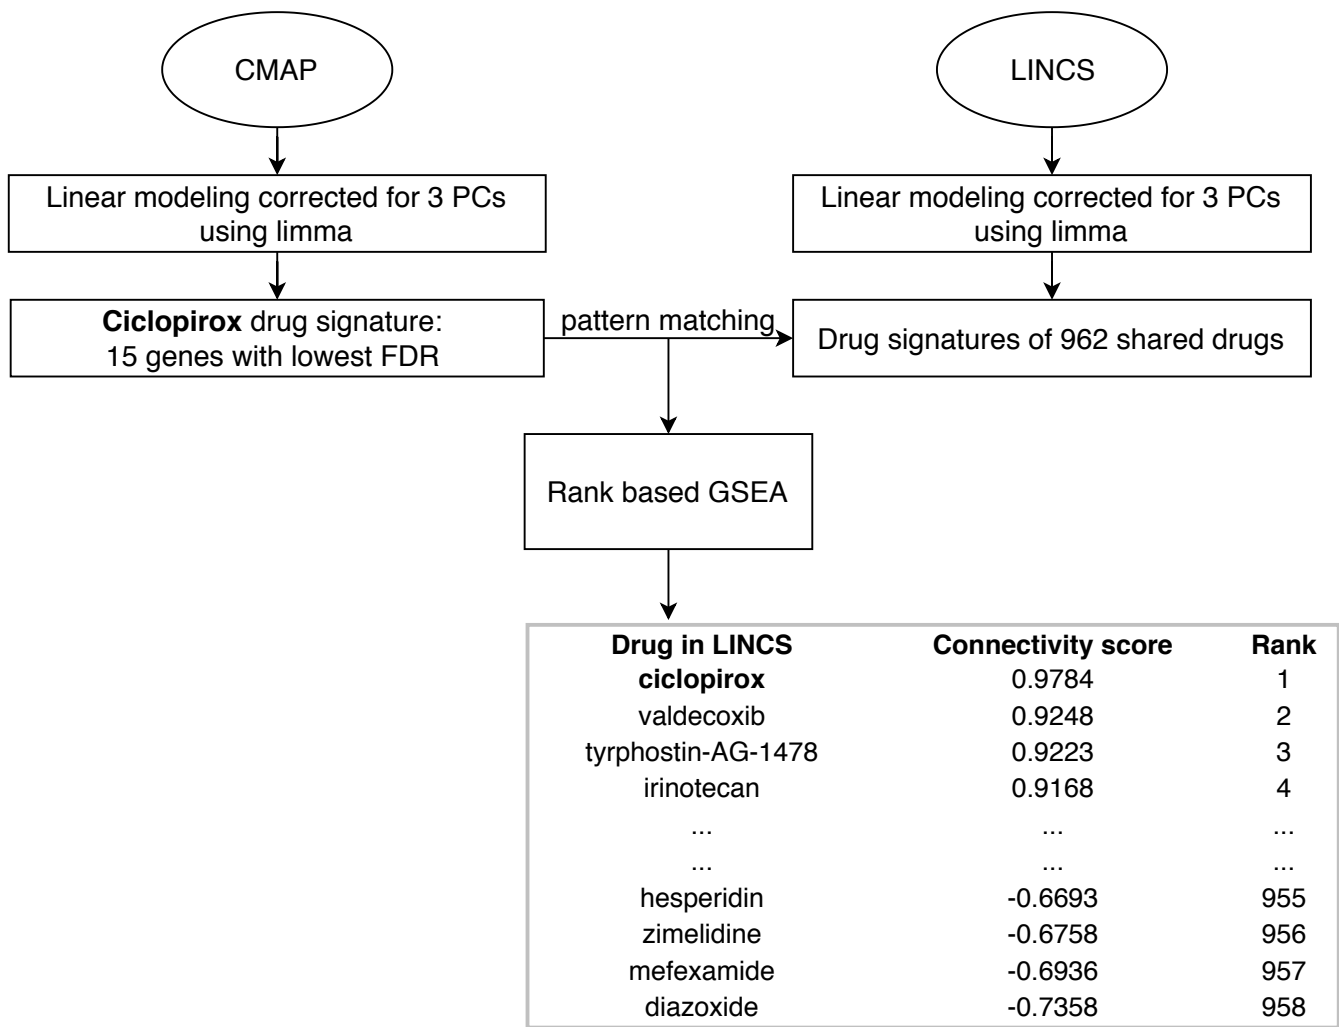

| Drug in LINCS      | Connectivity score | Rank |
|--------------------|--------------------|------|
| <b>ciclopirox</b>  | 0.9784             | 1    |
| valdecoxib         | 0.9248             | 2    |
| tyrphostin-AG-1478 | 0.9223             | 3    |
| irinotecan         | 0.9168             | 4    |
| ...                | ...                | ...  |
| ...                | ...                | ...  |
| hesperidin         | -0.6693            | 955  |
| zimetidine         | -0.6758            | 956  |
| mefexamide         | -0.6936            | 957  |
| diazoxide          | -0.7358            | 958  |
