# Supplementary material for: Influence of batch effect correction methods on drug induced differential gene expression profiles
Source: PubMed Central journal article supplement (PMC6706913; doi:10.1186/s12859-019-3028-6), 2019-08-22

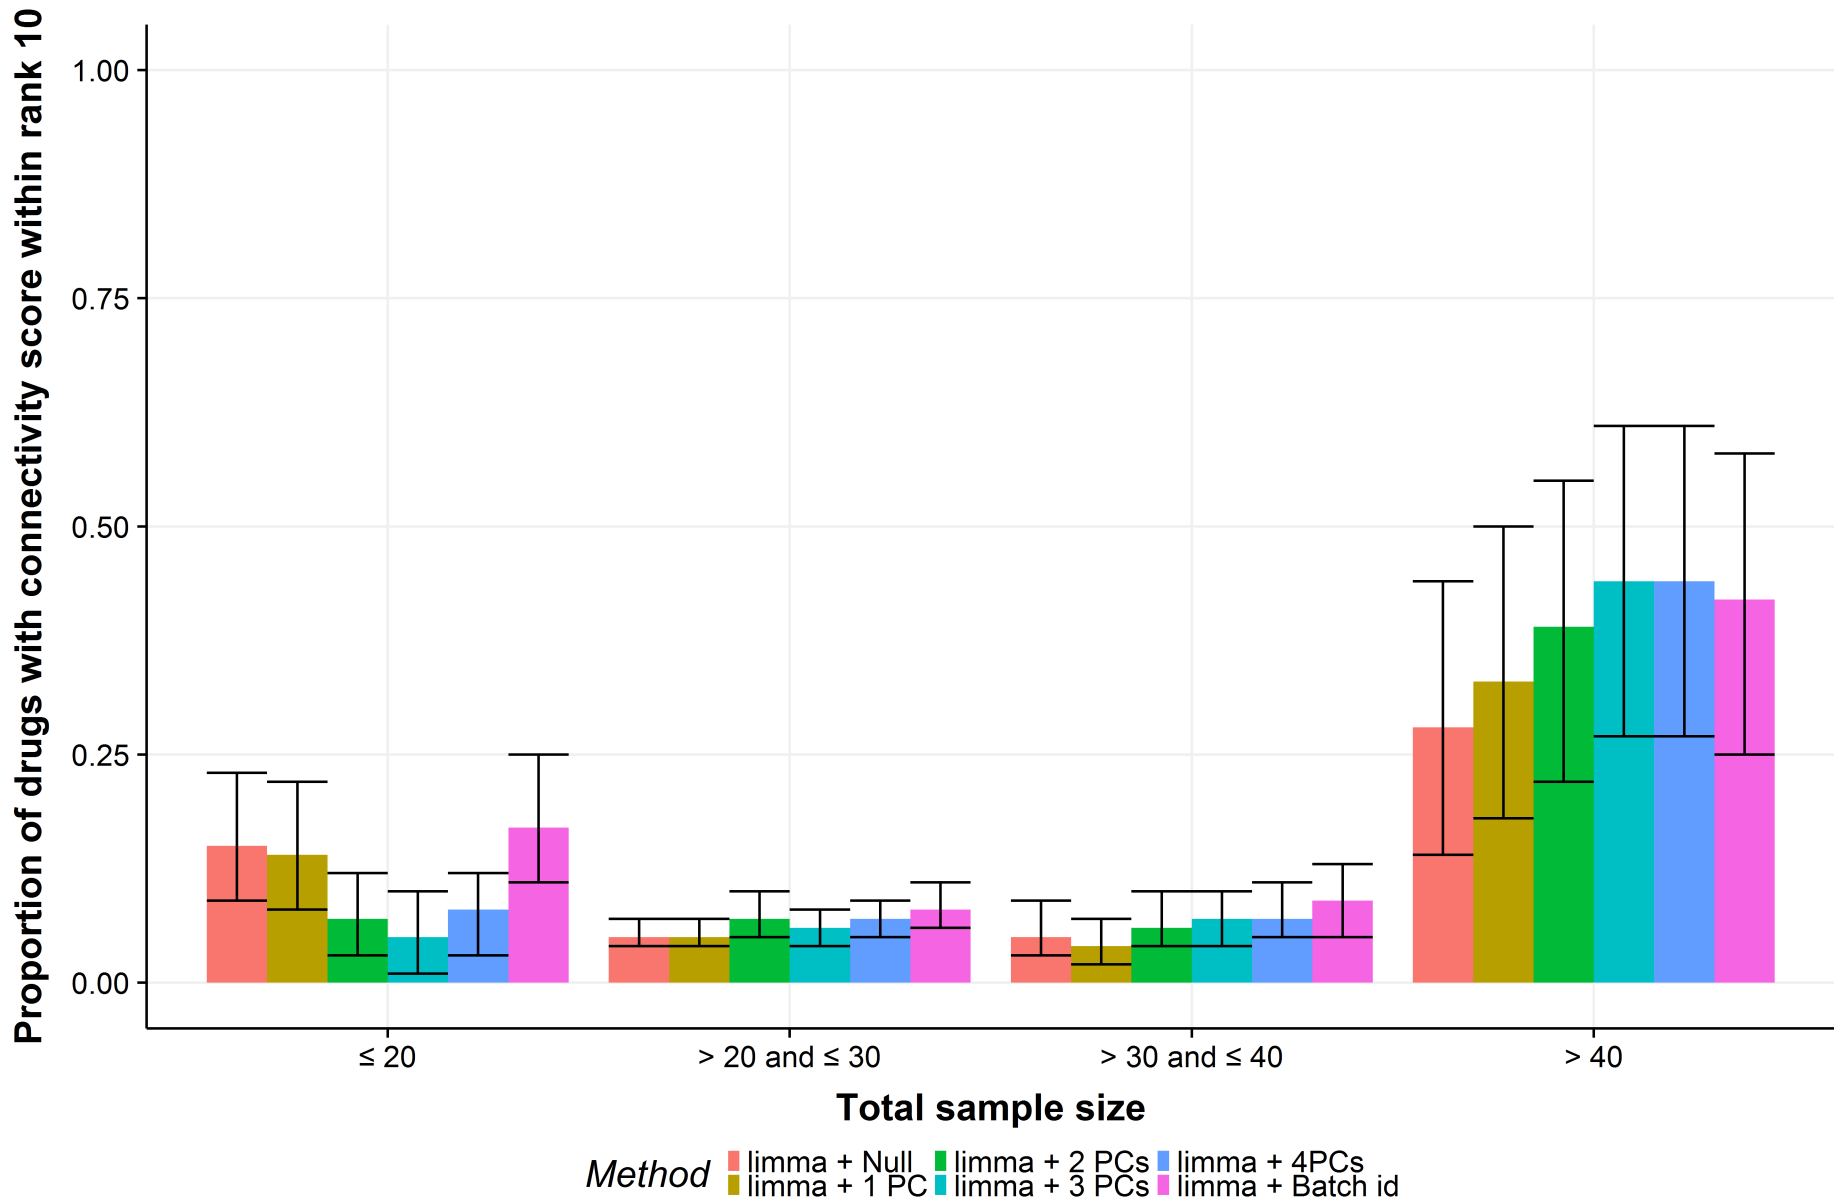

Supplement: 12859_2019_3028_MOESM3_ESM.pdf [file 12859_2019_3028_MOESM3_ESM.pdf]
